# Supplementary material for: Towards red-light o-carborane derivatives with both aggregation induced emission and thermally activated delayed fluorescence combining quantum chemistry calculation with molecular dynamics simulation
Source: Royal Society of Chemistry journal article supplement (doi:10.1039/c8tc06559d), 2019-01-01
Supplement: c8tc06559d1.pdf [file c8tc06559d1.pdf]

**Supplementary Information (ESI) for**  
**Towards Red–Light *o*-Carborane Derivatives with both**  
**Aggregation Induced Emission and Thermally Activated**  
**Delayed Fluorescence Combining Quantum Chemistry**  
**Calculation with Molecular Dynamics Simulation**

Ying-Chen Duan,<sup>a</sup> Ying Gao,<sup>a</sup> Yun Geng,<sup>\*a</sup> Yong Wu,<sup>b</sup>  
Guo-Gang Shan,<sup>\*a</sup> Liang Zhao,<sup>a</sup> Min Zhang<sup>a</sup> and Zhong-Min Su<sup>\*a, c, d</sup>

<sup>a</sup>Institute of Functional Material Chemistry, Faculty of Chemistry, Northeast Normal University, Changchun 130024, P. R. China  
E-mail: [gengy575@nenu.edu.cn](mailto:gengy575@nenu.edu.cn); [shangg187@nenu.edu.cn](mailto:shangg187@nenu.edu.cn); [zmsu@nenu.edu.cn](mailto:zmsu@nenu.edu.cn)

<sup>b</sup>School of Pharmaceutical Sciences, Changchun University of Chinese Medicine, 1035 Boshuo Road, Changchun, 130117, P. R. China

<sup>c</sup>School of Chemistry & Environmental Engineering, Changchun University of Science and Technology, Changchun, 130022, P. R. China

<sup>d</sup>Jilin Provincial Science and Technology Innovation Center of Optical Materials and Chemistry, Changchun, 130022, P. R. China

**Table S1** Selected bond lengths (Å) and dihedral angles (°) of **1** at  $S_0$  state calculated by different functionals compared with the experimental values of the X-ray diffraction crystal structure, together with their differences ( $\Delta$ ).

|                 | Expt.      | B3LYP<br>P | CAM-<br>B3LYP | PBE0       | TPSS<br>H | $\Delta$ (B3LYP<br>) | $\Delta$ (CAM-<br>B3LYP) | $\Delta$ (PBE0<br>) | $\Delta$ (TPSSH<br>) |
|-----------------|------------|------------|---------------|------------|-----------|----------------------|--------------------------|---------------------|----------------------|
| C1–C2           | 1.713      |            |               | 1.705      |           |                      |                          |                     |                      |
|                 | 6          | 1.7599     | 1.7022        | 6          | 1.7383    | 0.0463               | -0.0114                  | -0.0080             | 0.0247               |
| C1–C3           | 1.505      |            |               | 1.502      |           |                      |                          |                     |                      |
|                 | 3          | 1.5071     | 1.5074        | 2          | 1.5067    | 0.0018               | 0.0021                   | -0.0030             | 0.0015               |
| C2–C5           | 1.503      |            |               | 1.501      |           |                      |                          |                     |                      |
|                 | 7          | 1.5060     | 1.5057        | 1          | 1.5043    | 0.0023               | 0.0020                   | -0.0025             | 0.0007               |
| C2–C1–C3–C<br>4 | 105.3<br>4 | 97.80      | 105.83        | 106.4<br>2 | 106.02    | -7.54                | 0.49                     | 1.08                | 0.68                 |
| C1–C2–C5–C<br>6 | 125.3<br>8 | 100.21     | 103.39        | 106.9<br>1 | 103.11    | -25.17               | -21.98                   | -18.46              | -22.27               |

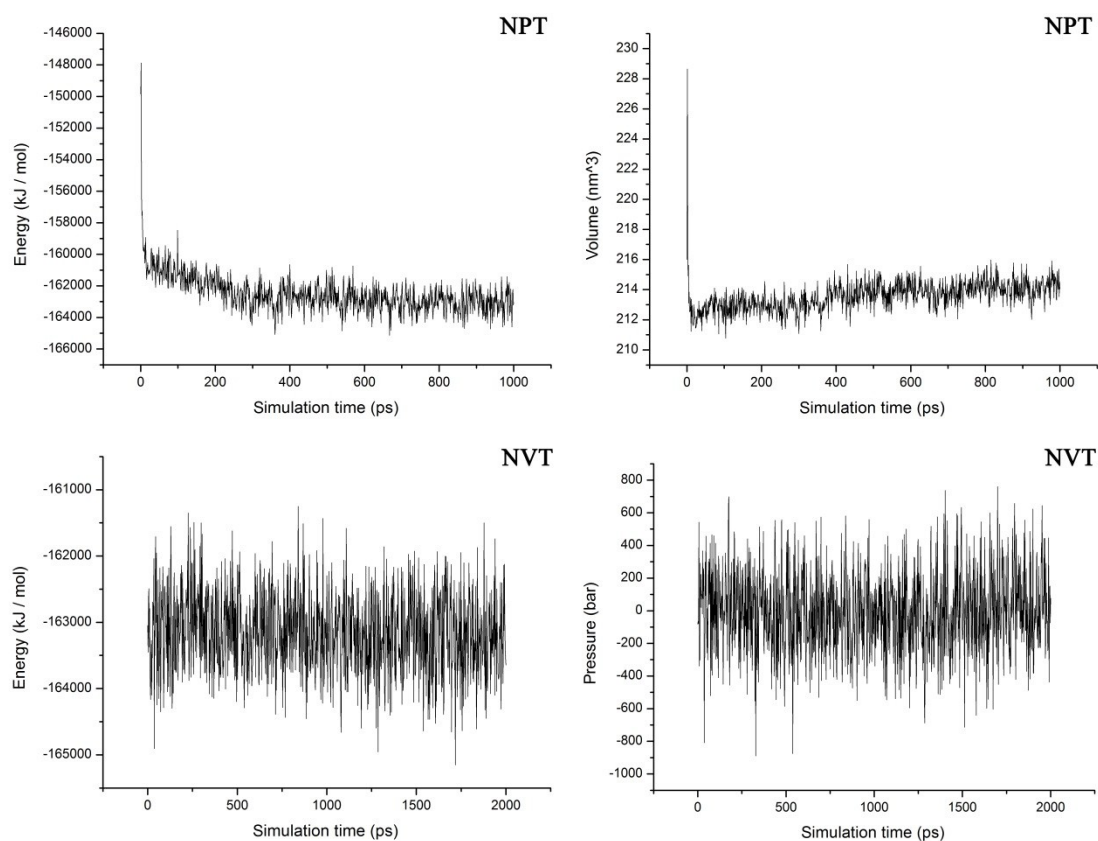

**Fig. S1** The plots of energy versus simulation time and volume versus simulation time in NPT process as well as energy versus simulation time and pressure versus simulation time in NVT process for **1**.

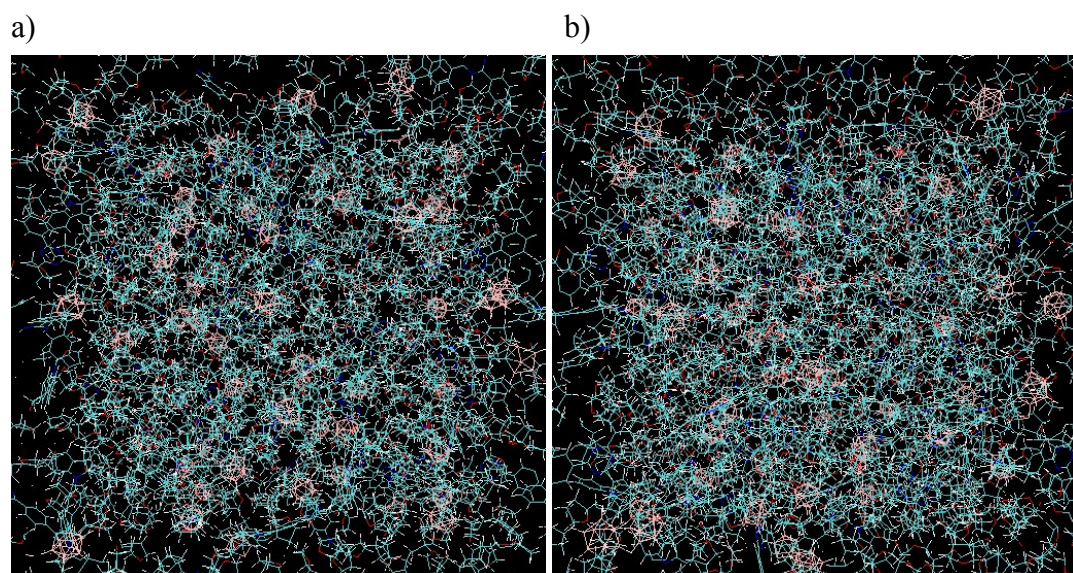

**Fig. S2** Position change of molecules in the 1/THF solution model before (a) and after (b) MD simulation.

**Table S2** Overlap integrals of the norms of HOMO and LUMO for **1-6** at their  $T_1$  states, respectively.

|                  | <b>1</b> | <b>2</b> | <b>3</b> | <b>4</b> | <b>5</b> | <b>6</b> |
|------------------|----------|----------|----------|----------|----------|----------|
| Overlap integral | 0.065    | 0.370    | 0.060    | 0.091    | 0.057    | 0.077    |

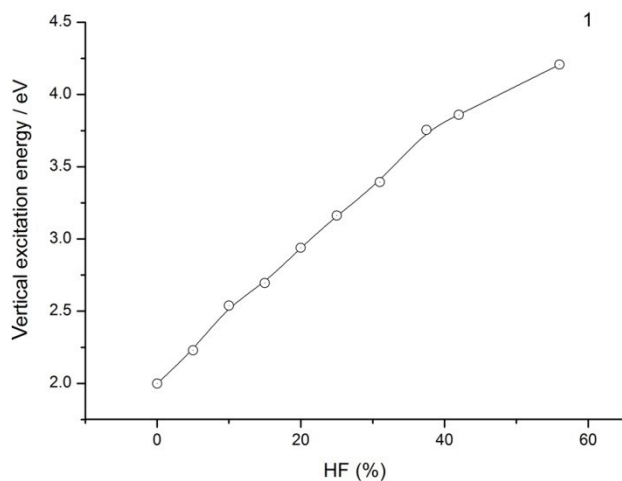

**Fig. S3** The calculated vertical excitation energies  $E_{VA}(S_1)/\text{eV}$  of  $S_0 \rightarrow S_1$  transition versus HF% for **1**.

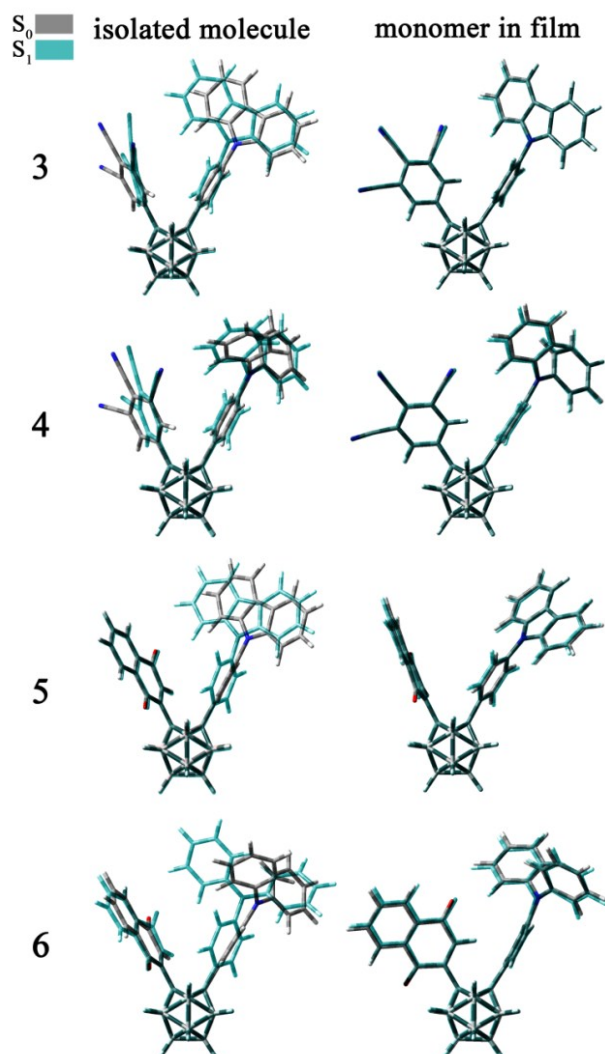

**Fig. S4** Structural changes from  $S_0$  (in grey) to  $S_1$  (in cyan) states for single **3-6** molecules in isolated state and cluster in film.

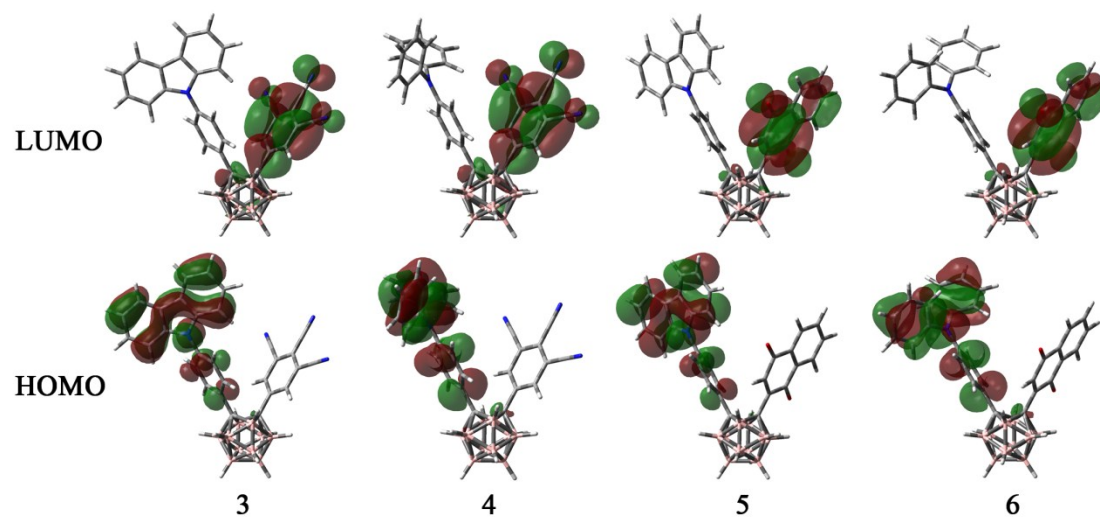

**Fig. S5** Calculated frontier molecular orbital diagrams of **3-6**.

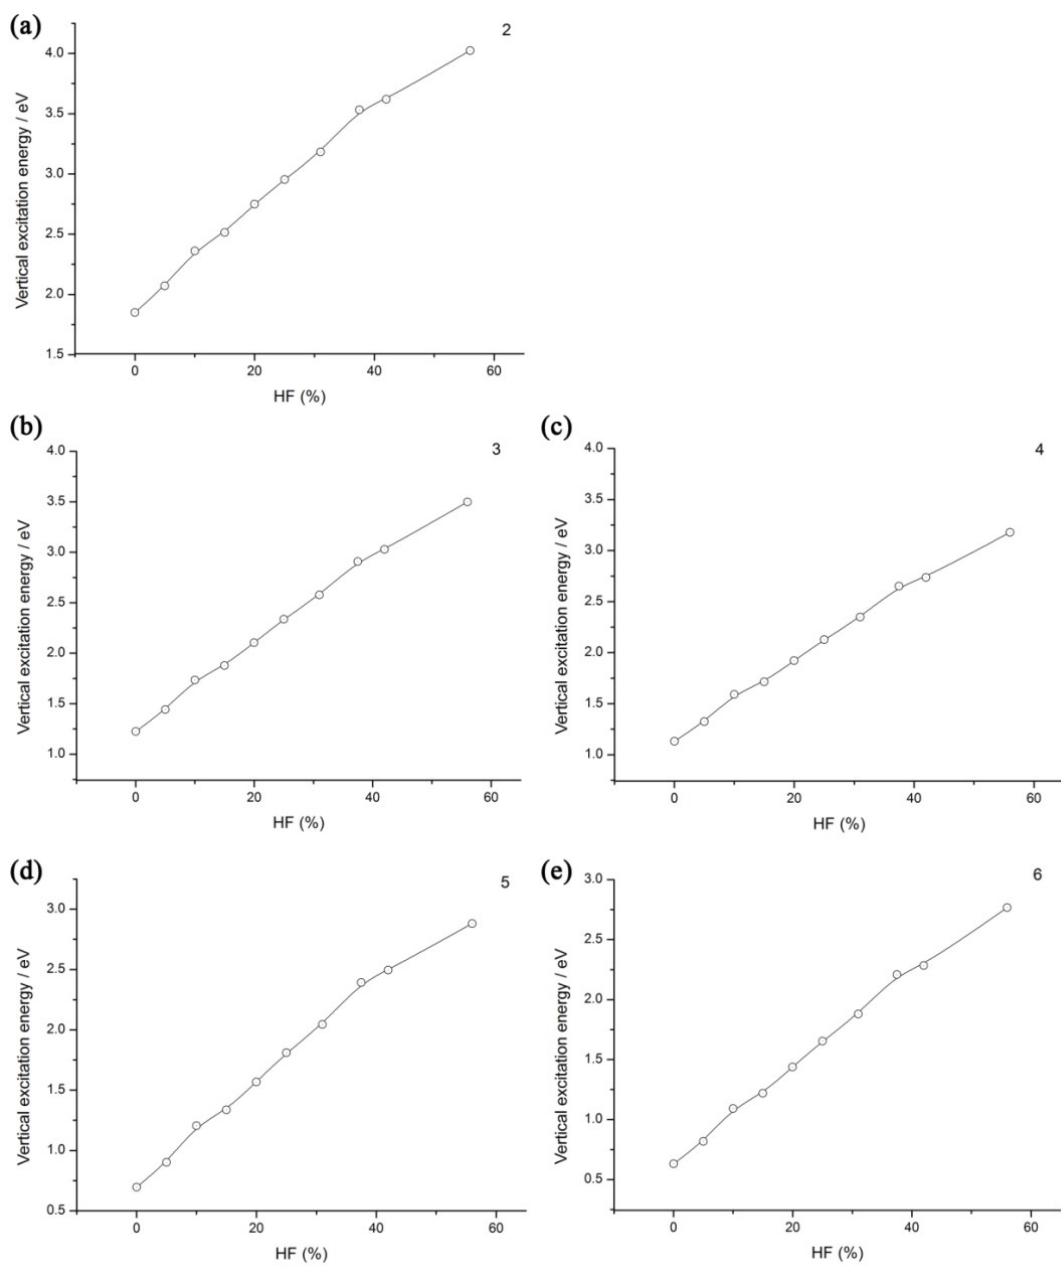

**Fig. S6** The calculated vertical excitation energies  $E_{VA}(S_1)/\text{eV}$  of  $S_0 \rightarrow S_1$  transition versus HF% for **2-6**.

**Table S3** Vertical excitation energies  $E(S_1)/\text{eV}$  of  $S_0 \rightarrow S_1$  transition for **3-6** calculated by different functionals with various HF percent, coupled with the values calculated by OHF[ $E_{VA}(S_1, \text{OHF})$ ] and the corresponding  $\Delta E_{ST}/\text{eV}$  [ $q$  denotes the CT amount in the excitation process and  $E_{VA}(T_1, \text{BLYP})$  is the vertical excitation energy of  $S_0 \rightarrow T_1$  transition].

| Functional                 | HF(100%) | <b>3</b>      | <b>4</b> | <b>5</b> | <b>6</b> |
|----------------------------|----------|---------------|----------|----------|----------|
|                            |          | $E_{VA}(S_1)$ |          |          |          |
| BLYP                       | 5        | 1.224         | 1.132    | 0.696    | 0.631    |
| MPWLYP1M                   | 10       | 1.442         | 1.325    | 0.902    | 0.818    |
| TPSSh                      | 15       | 1.735         | 1.590    | 1.206    | 1.092    |
| B3LYP*                     | 20       | 1.877         | 1.714    | 1.337    | 1.219    |
| B3LYP                      | 25       | 2.105         | 1.922    | 1.567    | 1.438    |
| PBE0                       | 31       | 2.338         | 2.128    | 1.811    | 1.655    |
| MPW1B95                    | 33.33    | 2.578         | 2.348    | 2.045    | 1.880    |
| PBE38                      | 37.5     | 2.909         | 2.652    | 2.392    | 2.208    |
| BMK                        | 42       | 3.028         | 2.737    | 2.495    | 2.284    |
| M062X                      | 56       | 3.499         | 3.178    | 2.881    | 2.766    |
| $42q$                      |          | 39.56         | 37.84    | 39.44    | 38.56    |
| $E_{VA}(S_1, \text{OHF})$  |          | 2.940         | 2.640    | 2.430    | 2.220    |
| $E_{VA}(T_1, \text{BLYP})$ |          | 1.221         | 1.123    | 0.681    | 0.606    |
| $\Delta E_{ST}$            |          | 0.009         | 0.023    | 0.052    | 0.090    |

**Table S4** Calculated C1–C2, C1–C3 and C2–C5 bond lengths (Å), C2–C1–C3–C4 dihedral angles and C1–C2–C5–C6 dihedral angles (°) of **1** before and after replacing the carborane moiety with phenyl moiety in  $S_0$  state at the PBE0/6-31G\* level.

|             | <b>1</b> | <b>1-Ph</b> |
|-------------|----------|-------------|
| C1–C2       | 1.7056   | 1.4135      |
| C1–C3       | 1.5022   | 1.4839      |
| C2–C5       | 1.5011   | 1.4736      |
| C2–C1–C3–C4 | 106.42   | 132.42      |
| C1–C2–C5–C6 | 106.91   | 129.65      |

**Table S5** Relative energy (eV) of **1** when the C2–C1–C3–C4 dihedral angle and the C1–C2–C5–C6 dihedral angle (°) respectively change between 10° and 180° (the lowest energy point is set as the zero of energy, where the dihedral angles are both 100°).

| 1<br>C1–C2–C5–C6 | C2–C1–C3–C4 |       |       |       |       |       |       |       |       |       |       |       |       |       |            |        |        |        |        |
|------------------|-------------|-------|-------|-------|-------|-------|-------|-------|-------|-------|-------|-------|-------|-------|------------|--------|--------|--------|--------|
|                  | 10          | 20    | 30    | 40    | 50    | 60    | 70    | 80    | 90    | 100   | 110   | 120   | 130   | 140   | 150        | 160    | 170    | 180    |        |
| 10               | 11.295      | 5.722 | 2.970 | 1.660 | 1.027 | 0.703 | 0.530 | 0.459 | 0.480 | 0.606 | 0.886 | 1.431 | 2.561 | 5.008 | 10.11<br>1 |        |        |        |        |
| 20               | 5.705       | 2.940 | 1.579 | 0.906 | 0.576 | 0.413 | 0.338 | 0.328 | 0.387 | 0.543 | 0.878 | 1.582 | 3.144 | 6.832 |            |        |        |        | 11.772 |
| 30               | 2.951       | 1.573 | 0.847 | 0.483 | 0.316 | 0.242 | 0.212 | 0.217 | 0.270 | 0.411 | 0.735 | 1.472 | 3.287 | 9.046 |            |        | 9.690  | 5.889  |        |
| 40               | 1.645       | 0.900 | 0.483 | 0.282 | 0.195 | 0.159 | 0.144 | 0.146 | 0.174 | 0.273 | 0.530 | 1.146 | 2.636 | 5.973 | 8.322      | 6.416  | 4.733  | 2.987  |        |
| 50               | 1.016       | 0.573 | 0.319 | 0.199 | 0.150 | 0.129 | 0.117 | 0.109 | 0.117 | 0.174 | 0.335 | 0.718 | 1.485 | 2.540 | 3.096      | 2.956  | 2.391  | 1.656  |        |
| 60               | 0.694       | 0.413 | 0.250 | 0.172 | 0.139 | 0.123 | 0.111 | 0.096 | 0.086 | 0.115 | 0.201 | 0.390 | 0.716 | 1.111 | 1.407      | 1.491  | 1.335  | 1.028  |        |
| 70               | 0.520       | 0.340 | 0.227 | 0.164 | 0.132 | 0.115 | 0.099 | 0.079 | 0.065 | 0.075 | 0.116 | 0.204 | 0.345 | 0.530 | 0.718      | 0.835  | 0.828  | 0.697  |        |
| 80               | 0.439       | 0.330 | 0.238 | 0.166 | 0.121 | 0.097 | 0.080 | 0.057 | 0.037 | 0.042 | 0.064 | 0.108 | 0.177 | 0.277 | 0.404      | 0.511  | 0.556  | 0.512  |        |
| 90               | 0.469       | 0.419 | 0.305 | 0.191 | 0.121 | 0.084 | 0.059 | 0.036 | 0.015 | 0.013 | 0.029 | 0.059 | 0.099 | 0.159 | 0.246      | 0.338  | 0.406  | 0.427  |        |
| 100              | 0.714       | 0.680 | 0.454 | 0.279 | 0.169 | 0.104 | 0.064 | 0.031 | 0.007 | 0.000 | 0.013 | 0.037 | 0.065 | 0.106 | 0.173      | 0.261  | 0.359  | 0.457  |        |
| 110              | 1.296       | 1.050 | 0.756 | 0.527 | 0.328 | 0.184 | 0.101 | 0.050 | 0.019 | 0.008 | 0.019 | 0.038 | 0.061 | 0.094 | 0.155      | 0.256  | 0.412  | 0.656  |        |
| 120              | 1.851       | 1.658 | 1.484 | 1.150 | 0.714 | 0.373 | 0.183 | 0.091 | 0.046 | 0.027 | 0.034 | 0.052 | 0.075 | 0.111 | 0.183      | 0.327  | 0.623  | 1.195  |        |
| 130              | 2.699       | 3.182 | 3.330 | 2.666 | 1.490 | 0.703 | 0.329 | 0.164 | 0.089 | 0.056 | 0.058 | 0.075 | 0.103 | 0.153 | 0.262      | 0.520  | 1.108  | 1.974  |        |
| 140              | 5.069       | 6.928 | 9.197 | 6.000 | 2.531 | 1.095 | 0.514 | 0.266 | 0.155 | 0.103 | 0.097 | 0.118 | 0.160 | 0.247 | 0.444      | 0.908  | 1.788  | 2.868  |        |
| 150              | 10.237      |       |       | 8.192 | 3.046 | 1.376 | 0.693 | 0.388 | 0.240 | 0.171 | 0.162 | 0.197 | 0.278 | 0.445 | 0.805      | 1.543  | 2.842  | 5.185  |        |
| 160              |             |       |       | 6.265 | 2.885 | 1.449 | 0.805 | 0.492 | 0.333 | 0.263 | 0.271 | 0.351 | 0.516 | 0.837 | 1.476      | 2.762  | 5.349  | 10.249 |        |
| 170              |             |       | 9.412 | 4.586 | 2.316 | 1.288 | 0.795 | 0.536 | 0.406 | 0.370 | 0.435 | 0.602 | 0.914 | 1.515 | 2.746      | 5.333  | 10.496 |        |        |
| 180              |             | 11.34 | 5.677 | 2.877 | 1.598 | 0.990 | 0.670 | 0.499 | 0.435 | 0.470 | 0.620 | 0.918 | 1.479 | 2.632 | 5.112      | 10.156 |        |        |        |



**Table S6** Relative energy (eV) of **1-Ph** when the C2–C1–C3–C4 dihedral angle and the C1–C2–C5–C6 dihedral angle (°) respectively change between 10° and 180° (the lowest energy point is set as the zero of energy, where the dihedral angles are both 130°).

| 1-Ph<br>C1–C2–C5–C6 | C2–C1–C3–C4 |        |       |       |       |       |       |       |       |       |       |       |       |       |        |        |        |        |
|---------------------|-------------|--------|-------|-------|-------|-------|-------|-------|-------|-------|-------|-------|-------|-------|--------|--------|--------|--------|
|                     | 10          | 20     | 30    | 40    | 50    | 60    | 70    | 80    | 90    | 100   | 110   | 120   | 130   | 140   | 150    | 160    | 170    | 180    |
| 10                  | 21.371      | 11.151 | 5.720 | 3.083 | 1.811 | 1.171 | 0.847 | 0.701 | 0.685 | 0.788 | 1.030 | 1.494 | 2.414 | 4.371 | 8.578  | 16.459 |        |        |
| 20                  | 11.183      | 5.701  | 3.038 | 1.686 | 1.002 | 0.661 | 0.516 | 0.488 | 0.556 | 0.726 | 1.054 | 1.704 | 3.098 | 6.145 | 12.701 |        |        | 20.140 |
| 30                  | 5.745       | 3.050  | 1.625 | 0.861 | 0.485 | 0.321 | 0.278 | 0.308 | 0.398 | 0.574 | 0.915 | 1.656 | 3.367 | 7.855 |        |        | 17.063 | 10.800 |
| 40                  | 3.115       | 1.709  | 0.872 | 0.418 | 0.213 | 0.142 | 0.143 | 0.183 | 0.259 | 0.397 | 0.691 | 1.388 | 3.169 | 8.790 |        |        | 8.512  | 5.450  |
| 50                  | 1.843       | 1.025  | 0.498 | 0.219 | 0.103 | 0.075 | 0.088 | 0.122 | 0.174 | 0.262 | 0.467 | 0.979 | 2.198 | 4.566 | 6.065  | 5.282  | 4.251  | 2.912  |
| 60                  | 1.199       | 0.684  | 0.338 | 0.152 | 0.079 | 0.068 | 0.084 | 0.110 | 0.142 | 0.187 | 0.297 | 0.575 | 1.142 | 1.922 | 2.445  | 2.540  | 2.267  | 1.733  |
| 70                  | 0.864       | 0.533  | 0.295 | 0.154 | 0.095 | 0.087 | 0.100 | 0.122 | 0.143 | 0.160 | 0.202 | 0.315 | 0.541 | 0.856 | 1.157  | 1.351  | 1.350  | 1.146  |
| 80                  | 0.706       | 0.507  | 0.331 | 0.200 | 0.132 | 0.114 | 0.122 | 0.139 | 0.152 | 0.156 | 0.162 | 0.192 | 0.274 | 0.423 | 0.619  | 0.805  | 0.889  | 0.830  |
| 90                  | 0.695       | 0.592  | 0.433 | 0.278 | 0.181 | 0.143 | 0.138 | 0.148 | 0.157 | 0.152 | 0.142 | 0.137 | 0.161 | 0.236 | 0.369  | 0.523  | 0.637  | 0.686  |
| 100                 | 0.848       | 0.804  | 0.618 | 0.416 | 0.270 | 0.189 | 0.156 | 0.152 | 0.150 | 0.139 | 0.120 | 0.102 | 0.102 | 0.140 | 0.231  | 0.364  | 0.532  | 0.725  |
| 110                 | 1.212       | 1.154  | 0.966 | 0.722 | 0.487 | 0.305 | 0.200 | 0.159 | 0.140 | 0.119 | 0.093 | 0.067 | 0.054 | 0.073 | 0.144  | 0.314  | 0.656  | 1.018  |
| 120                 | 1.669       | 1.792  | 1.737 | 1.466 | 1.038 | 0.604 | 0.321 | 0.192 | 0.135 | 0.099 | 0.066 | 0.034 | 0.016 | 0.030 | 0.139  | 0.492  | 1.065  | 1.287  |
| 130                 | 2.509       | 3.227  | 3.542 | 3.373 | 2.347 | 1.204 | 0.560 | 0.281 | 0.161 | 0.100 | 0.055 | 0.017 | 0.000 | 0.047 | 0.294  | 0.846  | 1.211  | 1.592  |
| 140                 | 4.509       | 6.408  | 8.274 |       | 4.869 | 2.009 | 0.884 | 0.436 | 0.241 | 0.143 | 0.082 | 0.042 | 0.047 | 0.167 | 0.521  | 0.941  | 1.492  | 2.504  |
| 150                 | 8.870       | 13.147 |       |       | 6.264 | 2.504 | 1.180 | 0.632 | 0.379 | 0.246 | 0.171 | 0.143 | 0.194 | 0.385 | 0.745  | 1.351  | 2.490  | 4.528  |
| 160                 | 16.952      |        |       |       | 5.329 | 2.559 | 1.359 | 0.815 | 0.542 | 0.398 | 0.335 | 0.351 | 0.479 | 0.773 | 1.345  | 2.457  | 4.587  | 8.768  |

---

|     |        |       |       |       |       |       |       |       |       |       |       |       |       |       |        |        |
|-----|--------|-------|-------|-------|-------|-------|-------|-------|-------|-------|-------|-------|-------|-------|--------|--------|
| 170 | 16.914 | 8.485 | 4.224 | 2.245 | 1.339 | 0.896 | 0.664 | 0.559 | 0.555 | 0.665 | 0.935 | 1.462 | 2.498 | 4.589 | 8.793  | 17.031 |
| 180 | 19.890 | 5.346 | 2.848 | 1.694 | 1.127 | 0.835 | 0.700 | 0.685 | 0.789 | 1.041 | 1.536 | 2.501 | 4.519 | 8.749 | 16.992 |        |

---

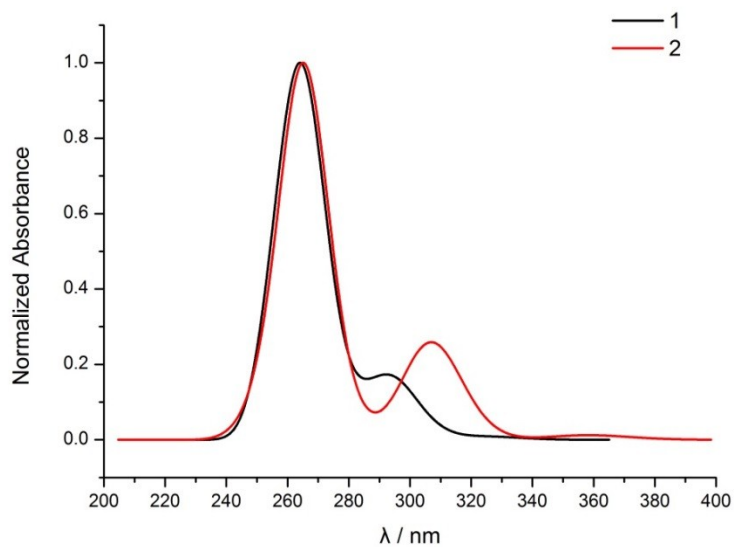

**Fig. S7** The simulated absorption spectra of **1** and **2** in THF media by using TD-DFT/PBE38 method.

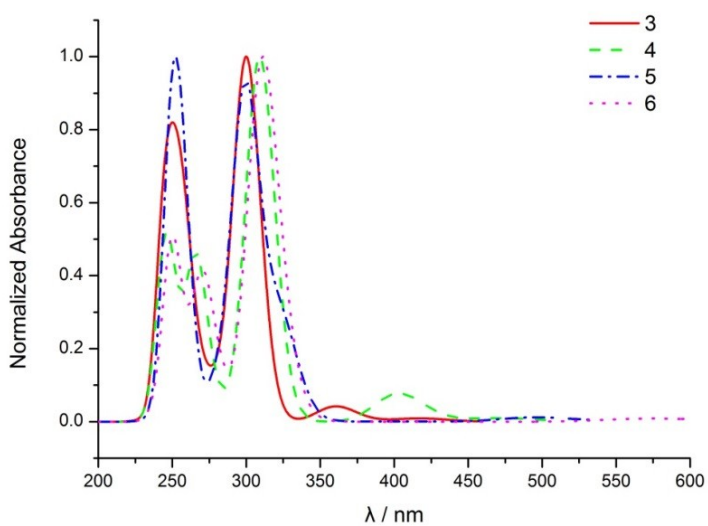

**Fig. S8** The simulated absorption spectra of **3-6** in THF media by using TD-DFT/PBE38 method.
